# Supplementary material for: Long-term exposure to NO2 and PM10 and all-cause and cause-specific mortality in a prospective cohort of women
Source: PubMed Central journal article supplement — Occup Environ Med. 2012 Dec 8;70(3):179–86. doi: 10.1136/oemed-2012-100876 (PMC3585480; doi:10.1136/oemed-2012-100876), 2012-12-08
Supplement: oemed-2012-100876-s2.pdf [file oemed-2012-100876-s2.pdf]

## Online Supplement

**E-Table 1** Number and causes of death (N = 4,752).

| Cause           | ICD 9-codes            | n (%)       |
|-----------------|------------------------|-------------|
| All cause       | All                    | 740 (100%)  |
| Natural cause   | < 800                  | 715 (96.6%) |
| Cardiovascular  | 400-440.9              | 233 (31.5%) |
| Respiratory     | 460-519.9              | 35 (4.7%)   |
| Cardiopulmonary | 400-440.9 or 460-519.9 | 268 (36.2%) |
| Lung cancer     | 162-162.9              | 41 (5.5%)   |
| Unknown         | None                   | 15 (2.0%)   |

**E-Table 2** Distribution of estimated annual average air pollution exposures (N = 4752).

| Pollutant                                            | Minimum | P25  | Median | Mean | P75  | Maximum |
|------------------------------------------------------|---------|------|--------|------|------|---------|
| <b>1-year average (year of baseline examination)</b> |         |      |        |      |      |         |
| PM <sub>10</sub> * [ $\mu\text{g}/\text{m}^3$ ]      | 34.8    | 39.8 | 42.6   | 43.7 | 46.9 | 52.5    |
| NO <sub>2</sub> [ $\mu\text{g}/\text{m}^3$ ]         | 20      | 29   | 41     | 39   | 45   | 60      |

\* calculated as  $\text{PM}_{10} = 0.71 \times \text{TSP}$
